# Supplementary material for: No Evidence of Abnormal Expression of Beta-Catenin and Bcl-2 Proteins in Pilomatricoma as One Clinical Feature of Tetrasomy 9p Syndrome
Source: Hindawi journal article supplement (doi:10.1155/2021/2612846), 2021-12-15
Supplement: f1 [file 2612846.f1.pdf]

**Supplementary Table 1. Mutations found in patients with genetic conditions and concurrent pilomatricomas<sup>†</sup>**

| Reference                                | Patient     |          |                             | Germline mutation                                                                                                 | Somatic mutation                                                                         |
|------------------------------------------|-------------|----------|-----------------------------|-------------------------------------------------------------------------------------------------------------------|------------------------------------------------------------------------------------------|
|                                          | Age (years) | Gender   | Number of pilomatricomas    |                                                                                                                   |                                                                                          |
| <b>Gardner syndrome</b>                  |             |          |                             |                                                                                                                   |                                                                                          |
| Trufant et al., 2012 [3] <sup>††</sup>   | 12          | Male     | Multiple                    | 2 bp deletion (c.426_427delAT) in exon 4 of <i>APC</i> gene → frameshift (p.Ser142fs*146)                         | Lower nuclear beta-catenin protein in basaloid component than in sporadic pilomatricomas |
|                                          | 14          | Female   | Multiple                    |                                                                                                                   |                                                                                          |
| Bendelsmith et al., 2018 [4]             | 11          | Female   | Multiple                    | Duplication (c.595dupG) in <i>APC</i> gene → frameshift (p.Ala199Glyfs*53)                                        | NA                                                                                       |
| <b>MYH-associated polyposis</b>          |             |          |                             |                                                                                                                   |                                                                                          |
| Baglioni et al., 2005 [31] <sup>††</sup> | 32          | Male     | Multiple                    | Homozygous 2 bp insertion (c.1186_1187insGG) in exon 13 of <i>MYH</i> gene → premature stop codon at position 438 | No mutations in exon 3 of <i>CTNNB1</i> gene                                             |
|                                          | 29          | Female   | Multiple                    |                                                                                                                   |                                                                                          |
| <b>Rubinstein-Taybi syndrome</b>         |             |          |                             |                                                                                                                   |                                                                                          |
| Rokunohe et al., 2016 [9]                | 12          | female   | Multiple                    | Duplication (c.5837dupC) in exon 31 of <i>CREBBP</i> gene → frameshift (p.Pro1947Thrfs*19)                        | c.122C>T (p.Thr41Ile) at phosphorylation site of beta-catenin protein                    |
| Papathemeli et al., 2015 [8]             | 49          | Female   | Multiple                    | Point mutation (c.6127C>T) in exon 31 of <i>CREBBP</i> gene → nonsense (p.Glu2043*)                               | NA                                                                                       |
| <b>Turner syndrome</b>                   |             |          |                             |                                                                                                                   |                                                                                          |
| Maeda et al., 2014 [21]                  | 22          | Female   | Multiple                    | NA                                                                                                                | Expression of beta-catenin protein in nuclei of basaloid cells                           |
| Handler et al., 2013 [20]                | 5           | Female   | Solitary                    | 45,X                                                                                                              | NA                                                                                       |
|                                          | 15          | Female   | Solitary                    | 45,X/46,X, idic(X)                                                                                                | NA                                                                                       |
|                                          | 24          | Female   | Multiple                    | 45,X                                                                                                              | NA                                                                                       |
|                                          | 16          | Female   | Multiple                    | 45,X                                                                                                              | NA                                                                                       |
|                                          | 11          | Female   | Multiple                    | 46,X,del(X)(p11.22)                                                                                               | NA                                                                                       |
|                                          | 9           | Female   | Multiple                    | 45,X/46,X, idic(Y)(p11.3)/47,X, idic(Y)(p11.3), idic(Y)(p11.3)                                                    | NA                                                                                       |
|                                          | 10          | Female   | Solitary                    | 45,X/46,X,r(X)                                                                                                    | NA                                                                                       |
| 4                                        | Female      | Solitary | 45,X/46,X,psu dic(Y)(p11.3) | NA                                                                                                                |                                                                                          |
| Bengtzen et al., 2009 [19]               | 13          | Female   | Multiple                    | 45,X/46,XY                                                                                                        | NA                                                                                       |
| Noguchi et al., 1999 [17]                | 23          | Female   | Solitary                    | 45,X                                                                                                              | NA                                                                                       |
|                                          | 19          | Female   | Multiple                    | 45,X/46,X,i(Xq)                                                                                                   | NA                                                                                       |

**Supplementary Table 1. Mutations found in patients with genetic conditions and concurrent pilomatricomas<sup>†</sup>**

| Reference                                        | Patient     |        |                                                         | Germline mutation                                                                                                                                                        | Somatic mutation                                                                                                                                                                                                                                                                                    |
|--------------------------------------------------|-------------|--------|---------------------------------------------------------|--------------------------------------------------------------------------------------------------------------------------------------------------------------------------|-----------------------------------------------------------------------------------------------------------------------------------------------------------------------------------------------------------------------------------------------------------------------------------------------------|
|                                                  | Age (years) | Gender | Number of pilomatricomas                                |                                                                                                                                                                          |                                                                                                                                                                                                                                                                                                     |
| <b>Sotos syndrome</b>                            |             |        |                                                         |                                                                                                                                                                          |                                                                                                                                                                                                                                                                                                     |
| Gilaberte et al., 2008 [28]                      | 9           | Male   | Multiple                                                | Deletion (A6442delAGCGACCA, Lys2151fs*) in exon 22 of <i>NSD1</i> gene                                                                                                   | Same deletion of <i>NSD1</i> gene<br>No mutations of <i>CTNNB1</i> gene                                                                                                                                                                                                                             |
| <b>Constitutional mismatch repair deficiency</b> |             |        |                                                         |                                                                                                                                                                          |                                                                                                                                                                                                                                                                                                     |
| Chmara et al., 2013 [27]                         | 11          | Male   | Multiple                                                | Homozygous mutation, c.1164delT in exon 11 of <i>PMS2</i> gene → premature stop codon (p.His388Glnfs*9)                                                                  | - No microsatellite instability in pilomatricoma tissues<br>- Loss of nuclear PMS2 protein expression in neoplastic and non-neoplastic cells in pilomatricoma tissues<br>- c.94G>T (p.Asp32Tyr), c.122C>T (p.Thr41Ile), c.121A>G (p.Thr41Ala), c.97T>C (p.Ser33Pro) in exon 3 of <i>CTNNB1</i> gene |
|                                                  | 4           | Female | Multiple                                                | Maternal deletion of exons 7–8 c.(?_706)_(9031_?)del and paternal a deletion of exons 9–15 c.(?_904)_(?*+_?)del of <i>PMS2</i> gene                                      | - No microsatellite instability in pilomatricoma tissues<br>- Loss of nuclear PMS2 protein expression in neoplastic and non-neoplastic cells in pilomatricoma tissues<br>- c.122C>T (p.Thr41Ile) in exon 3 of <i>CTNNB1</i> gene                                                                    |
|                                                  | 15          | Male   | Multiple                                                | Heterozygous splice site mutation, c.705+2T>C in <i>PMS2</i> intron 6 and heterozygosity for 3 exonic polymorphic variants, including c.780C>G, c.1408C>T, and c.1621A>G | - c.122C>T (p.Thr41Ile), c.121A>G (p.Thr41Ala), c.97T>C (p.Ser33Pro) in exon 3 of <i>CTNNB1</i> gene                                                                                                                                                                                                |
| <b>Myotonic dystrophy</b>                        |             |        |                                                         |                                                                                                                                                                          |                                                                                                                                                                                                                                                                                                     |
| Rübben et al., 2020 [11]                         | 39          | Male   | Multiple pilomatricomas and one pilomatricoma carcinoma | > 400 CTG-repeat expansion in <i>DMPK</i> gene<br>Heterozygous mutation c.8494C>T (p.Arg2832Cys) in exon 3 of <i>ATM</i> gene                                            | p.Ser33Cys, p.Ser33Phe, p.Gly34Val, p.Thr41Ile and p.Gly34dup of <i>CTNNB1</i> gene<br>No abnormal microsatellites and no mutations of mismatch repair genes ( <i>MLH1</i> , <i>MSH2</i> , <i>MSH6</i> , and <i>PMS2</i> )<br>Heterozygous mutation c.8494C>T (p.Arg2832Cys) in <i>ATM</i> gene     |
| <b>Gain of chromosome 9 materials</b>            |             |        |                                                         |                                                                                                                                                                          |                                                                                                                                                                                                                                                                                                     |
| Matsuura et al., 2002 [33]                       | 4           | Female | Multiple                                                | 47,XX, +mar[22]/46,XX[8].ish i(9)(p10)(wcp9+) i(9) in 26.7% of cultured lymphocyte                                                                                       | NA                                                                                                                                                                                                                                                                                                  |

**Supplementary Table 1. Mutations found in patients with genetic conditions and concurrent pilomatricomas<sup>†</sup>**

| Reference                     | Patient     |        |                          | Germline mutation                                                                                                                                                                          | Somatic mutation                                                                                                 |
|-------------------------------|-------------|--------|--------------------------|--------------------------------------------------------------------------------------------------------------------------------------------------------------------------------------------|------------------------------------------------------------------------------------------------------------------|
|                               | Age (years) | Gender | Number of pilomatricomas |                                                                                                                                                                                            |                                                                                                                  |
| Blaya et al., 2009 [32]       | 15          | Male   | Multiple                 | 46 XY (42.4%)47 XY + del9 (pter-q32) (57.6%) <sup>†††</sup> +del(9) in 57.6% of cultured lymphocyte                                                                                        | NA                                                                                                               |
| El Khattabi et al., 2015 [34] | 18          | Female | Multiple                 | 47,XX,+psu idic(9)(pter→q21::q21→pter) idic(9) in 90% of cultured lymphocytes, 30% in cultured skin fibroblasts and 30% in urine sediment                                                  | NA                                                                                                               |
|                               | 7.5         | Female | Multiple                 | 47,XY,+psu idic(9)(pter→q12 or 13::q13 or 12→pter) idic(9) in 90% of cultured lymphocytes                                                                                                  | NA                                                                                                               |
|                               | 18          | Female | Multiple                 | 47,XY,+psu idic(9)(pter→q12 or 13::q13 or 12→pter) idic(9) in 75% of cultured lymphocytes, 0% in cultured skin fibroblasts and 40% in buccal smear                                         | NA                                                                                                               |
| Our patient                   | 4           | Female | ? Multiple               | 47,XX,+psu idic(9)(q12).arr [GRCh37] 9p24.3p12(46,587_42,374,011)x4 dn 100% of idic(9) in of cultured lymphocytes (20/20 cells), 8.3% of idic(9) in cultured skin fibroblasts (3/36 cells) | 0% of idic(9) in pilomatricoma (0/27 cells)<br>No beta-catenin and bcl2 protein expression in basaloid component |

<sup>†</sup> Only patients with information regarding mutations are included in the table. Association between pilomatricoma and some genetic conditions have been suggested; wherein, tumorigenesis has been linked between genes responsible for these genetic conditions in addition to beta-catenin regulation in Wnt signaling pathways. In Wnt signaling pathways, adenomatous polyposis coli, axin1, casein kinase 1 alpha, and glycogen synthase kinase 3 beta proteins are components of beta-catenin destruction complex. The complex binds to beta-catenin, and sequentially phosphorylate beta-catenin, targeting it for ubiquitin-dependent degradation by the proteasome [37]. Mutations of *APC* genes, which are responsible for Gardner syndrome, result in truncated APC proteins, and ultimately lead to an accumulation of beta-catenin protein [3]. Linking between genes responsible for other genetic conditions and pilomatricoma have been hypothesized with some supporting evidences. For example, mutations of *CREBBP* gene on chromosome 16p13.3 are responsible for Rubinstein Taybi syndrome. *CREBBP* gene plays a role in the maintenance of genomic integrity in stem cells, and initiation of a differentiation by controlling the interaction of the nuclear receptor family with the Wnt signaling cascade [a]. In tuberous sclerosis complex, mutations of *TSC1* and *TSC2* genes on chromosome 9q34 and 16p13.3, respectively, are responsible for the disease. *TSC1/TSC2* protein complex is associated with glycogen synthase kinase 3 beta and axin1 proteins, which in turn, promotes beta-catenin degradation. Missense mutation of *TSC* gene caused its failure to inhibit beta-catenin [26, b]. In Turner syndrome, low levels of glypican-3 protein, encoded by *GPC3* gene on chromosome Xq26.2, results in increases of beta-catenin [20]. In constitutive mismatch repair deficiency, *CTNNB1* gene is a target for mutations when mismatched repair is impaired due to biallelic *PMS2* mutations [27].

#### References

- M. Ono, K.K.Y. Lai, K. Wu, et al., “Nuclear receptor/Wnt beta-catenin interactions are regulated via differential CBP/p300 coactivator usage.” *PLOS ONE*. vol. 13, no. 7, pp. e0200714, 2018.
- B.C. Mak, H.L. Kenerson, L.D. Aicher, et al., “Aberrant beta-catenin signaling in tuberous sclerosis.” *The American Journal of Pathology*. vol. 167, no. 1, pp. 107–116, 2005.

<sup>††</sup> Study of siblings with the same genetic conditions.

<sup>†††</sup> Cytogenetic nomenclature remains the same as in the publication.

**Supplementary Figure 1.** Gene network shows interactions between *CTNNB1* gene and other genes, including *CDKN2A* gene on chromosome 9 (<https://string-db.org/>).

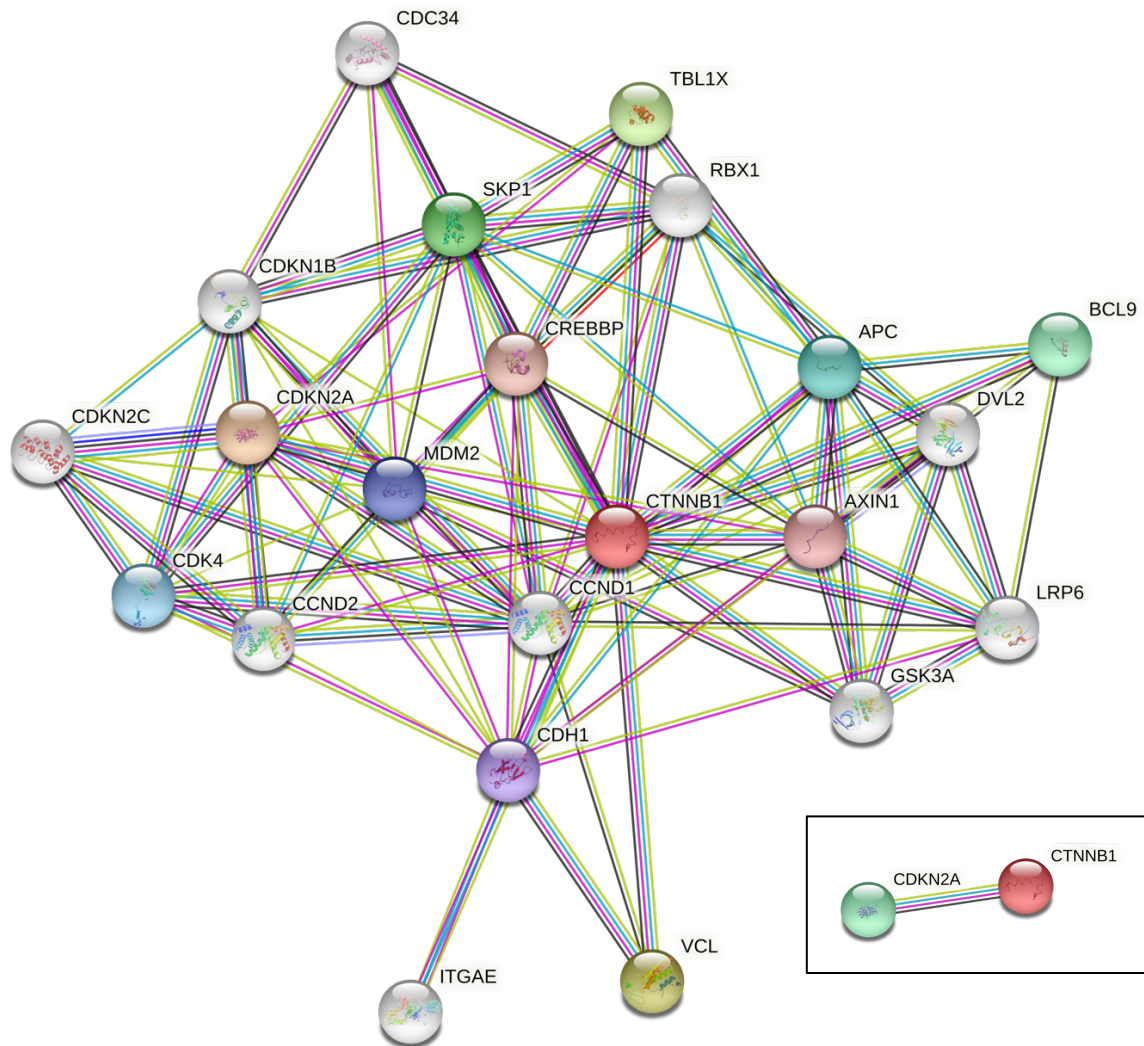

**Nodes:**

Network nodes represent proteins

*splice isoforms or post-translational modifications are collapsed, i.e. each node represents all the proteins produced by a single, protein-coding gene locus.*

**Node Color**

-  *colored nodes: query proteins and first shell of interactors*
-  *white nodes: second shell of interactors*

**Node Content**

-  *empty nodes: proteins of unknown 3D structure*
-  *filled nodes: some 3D structure is known or predicted*

**Edges:**

Edges represent protein-protein associations

*associations are meant to be specific and meaningful, i.e. proteins jointly contribute to a shared function; this does not necessarily mean they are physically binding to each other.*

**Known Interactions**

-  *from curated databases*
-  *experimentally determined*

**Predicted Interactions**

-  *gene neighborhood*
-  *gene fusions*
-  *gene co-occurrence*

**Others**

-  *textmining*
-  *co-expression*
-  *protein homology*
